# Supplementary material for: Anisotropic polymer nanoparticles with solvent and temperature dependent shape and size from triblock copolymers
Source: Royal Society of Chemistry journal article supplement (doi:10.1039/c9py00363k), 2019-01-01
Supplement: c9py00363k1.pdf [file c9py00363k1.pdf]

# Anisotropic Polymer Nanoparticles with Solvent and Temperature Dependent Shape and Size from Triblock Copolymers

Elena Bobbi,<sup>1</sup> Bassem Sabagh,<sup>2</sup> Sally-Ann Cryan,<sup>3,4,5</sup> James A. Wilson,<sup>1,5</sup> Andreas Heise<sup>1,5\*</sup>

<sup>1</sup>Department of Pharmaceutical and Medicinal Chemistry, Royal College of Surgeons in Ireland (RCSI), 123 St. Stephens Green, Dublin 2, Ireland. <sup>2</sup>Postnova Analytics UK Ltd, Malvern Hills Science Park, Malvern, UK. <sup>3</sup>Trinity Centre for Bioengineering, Trinity College Dublin (TCD), Dublin, Ireland. <sup>4</sup>Drug Delivery & Advanced Materials Team, School of Pharmacy & Tissue Engineering Research Group, Department of Anatomy, Royal College of Surgeons in Ireland (RCSI), 123 St. Stephens Green, Dublin 2, Ireland. <sup>5</sup>Centre for Research in Medical Devices (CURAM), RCSI, Dublin and National University of Ireland, Galway, Ireland.

## Table of Contents

|                                                       |    |
|-------------------------------------------------------|----|
| 1. NMR Spectra .....                                  | 2  |
| 2. GPC .....                                          | 7  |
| 3. FTIR spectra .....                                 | 10 |
| 4. CD spectra .....                                   | 10 |
| 4.1 CD spectra of particles from THF procedure.....   | 10 |
| 4.2 CD spectra of particles from HFIP procedure ..... | 11 |
| 5. AF4 experiments.....                               | 12 |
| 6. DLS experiments .....                              | 15 |
| 6.1 DLS from THF solvent exchange procedure.....      | 15 |
| 6.2 DLS from HFIP solvent exchange procedure.....     | 17 |

# 1. NMR Spectra

## H<sub>1</sub> - Phth-poly(NIPAM)<sub>79</sub>-TTC

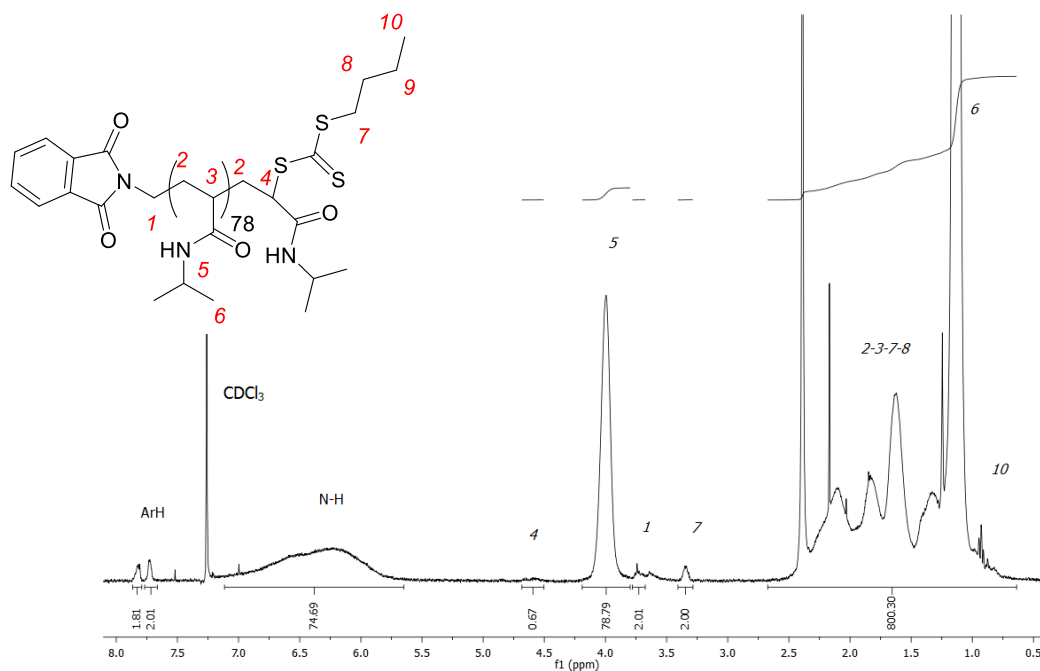

**Figure S1:** <sup>1</sup>H-NMR of H<sub>1</sub> (400 MHz, CDCl<sub>3</sub>, 303 K)  $\delta$  = 7.75 (m, 2H, ArH), 7.67 (m, 2H, ArH), 6.22 (br, 79 H, N-H), 4.62 (s, 1 H, -CH(S)C), 4.00 (s, 79 H, -CH(NH)(CH<sub>3</sub>)<sub>2</sub>), 3.73-3.63 (m, 2H, -CH<sub>2</sub>-Phth), 3.34 (br, 2H, -CH<sub>2</sub>S(CS<sub>2</sub>)), 2.5-1 (br, acrylic backbone), 1.07 (s, (CH<sub>3</sub>)<sub>2</sub>-CHN-), 0.93 (m, -CH<sub>3</sub>) ppm.

## D<sub>1</sub> - Phth-poly[(NIPAM)<sub>79</sub>-b-(PEGA)<sub>66</sub>]-TTC

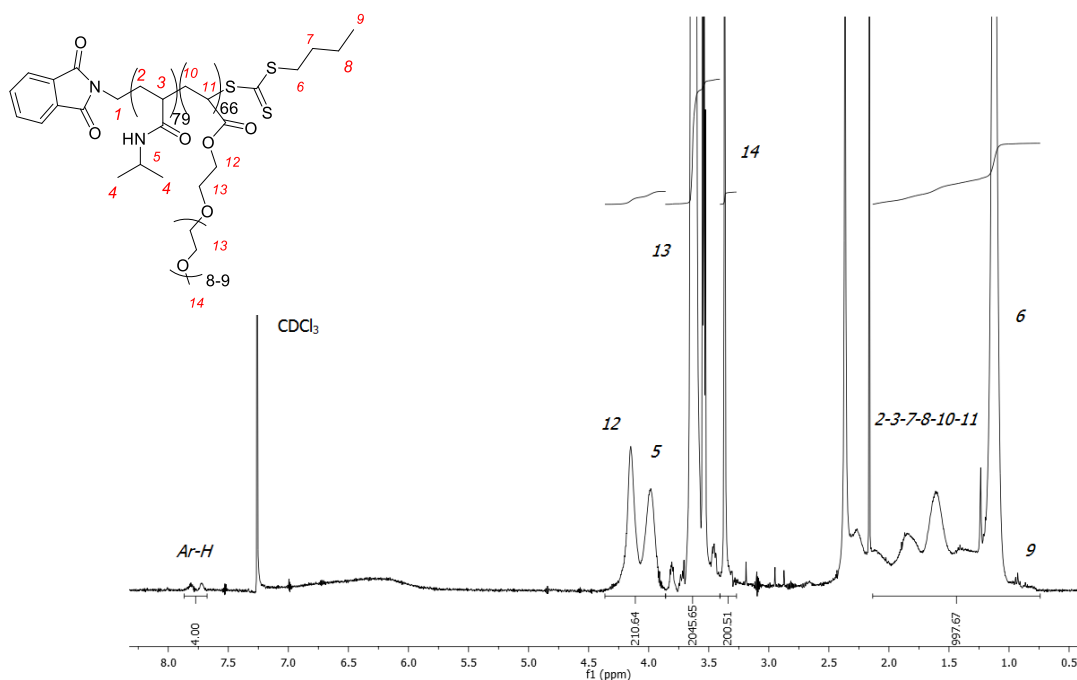

**Figure S2:** <sup>1</sup>H-NMR of D<sub>1</sub> (400 MHz, CDCl<sub>3</sub>, 303 K)  $\delta$  = 7.82 (m, ArH), 7.73 (m, ArH), 4.16 (s, -CH<sub>2</sub>OC(O)), 4.00 (s, -CH(NH)(CH<sub>3</sub>)<sub>2</sub>), 3.65 (m, -OCH<sub>2</sub>CH<sub>2</sub>O-), 3.38 (s, -OCH<sub>3</sub>), 2.2-1.2 (br, alkyl chain), 1.13 (s, (CH<sub>3</sub>)<sub>2</sub>CHN-), 0.93 (m, -CH<sub>3</sub>) ppm.

### D<sub>1</sub> - H<sub>2</sub>N-poly[(NIPAM)<sub>79</sub>-*b*-(PEGA)<sub>66</sub>]-H

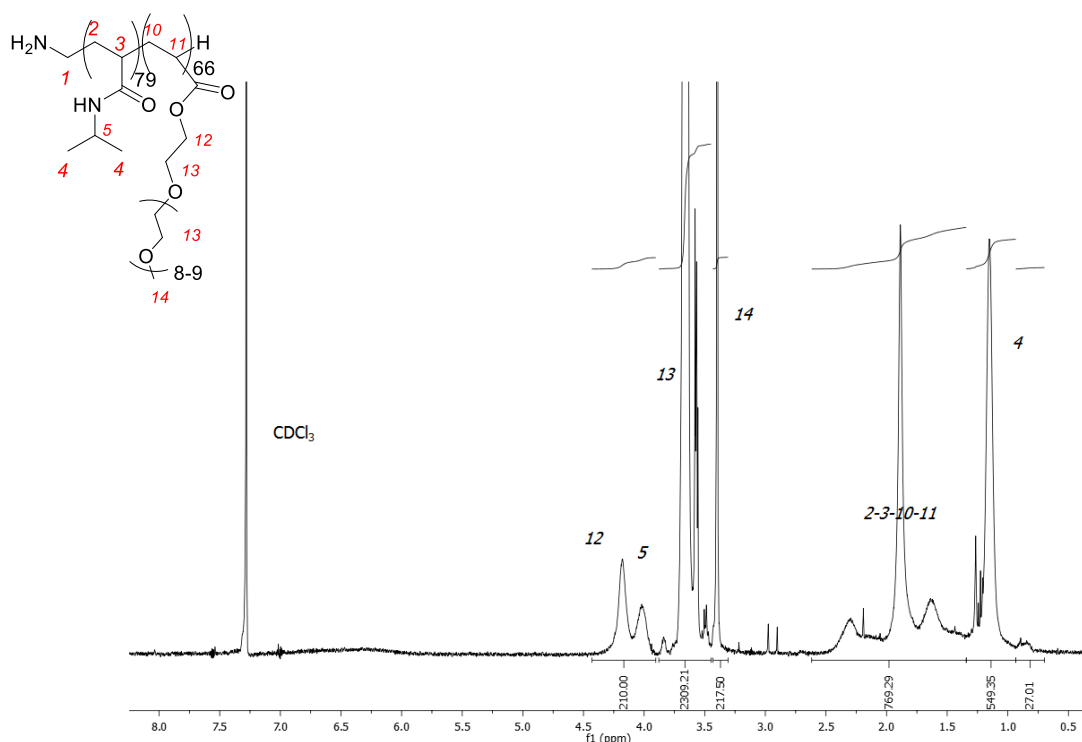

**Figure S3:** <sup>1</sup>H-NMR of D<sub>1</sub> after end cleavages (400 MHz, CDCl<sub>3</sub>, 303 K)  $\delta$  = 4.16 (s, -CH<sub>2</sub>OC(O)), 4.00 (s, -CH(NH)(CH<sub>3</sub>)<sub>2</sub>), 3.65 (m, -OCH<sub>2</sub>CH<sub>2</sub>O-), 3.38 (s, -OCH<sub>3</sub>), 2.2-1.2 (br, alkyl chain), 1.13 (s, (CH<sub>3</sub>)<sub>2</sub>CHN-) ppm.

### D<sub>2</sub> - Phth-poly[(NIPAM)<sub>79</sub>-*b*-(PEGA)<sub>9</sub>]-TTC

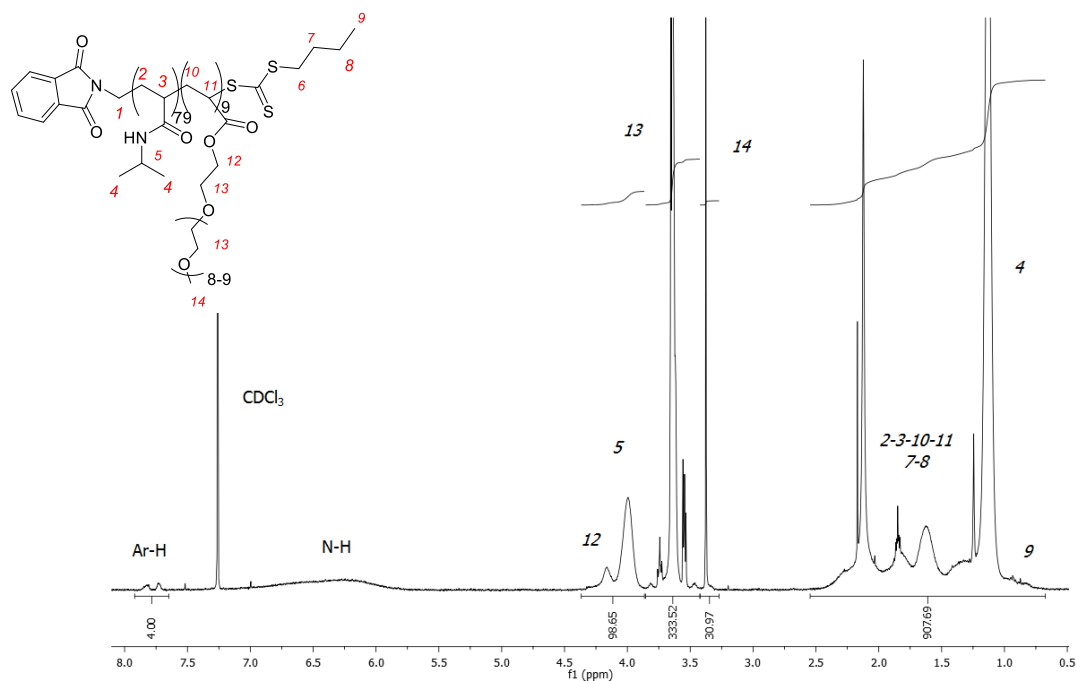

**Figure S4:** <sup>1</sup>H-NMR of D<sub>2</sub> (400 MHz, CDCl<sub>3</sub>, 303 K)  $\delta$  = 7.82 (m, ArH), 7.73 (m, ArH), 4.16 (s, -CH<sub>2</sub>OC(O)), 4.00 (s, -CH(NH)(CH<sub>3</sub>)<sub>2</sub>), 3.65 (m, -OCH<sub>2</sub>CH<sub>2</sub>O-), 3.38 (s, -OCH<sub>3</sub>), 2.2-1.2 (br, alkyl chain), 1.13 (s, (CH<sub>3</sub>)<sub>2</sub>CHN-), 0.93 (m, -CH<sub>3</sub>) ppm.

## D<sub>2</sub> - H<sub>2</sub>N-poly[(NIPAM)<sub>79</sub>-*b*-(PEGA)<sub>9</sub>]-H

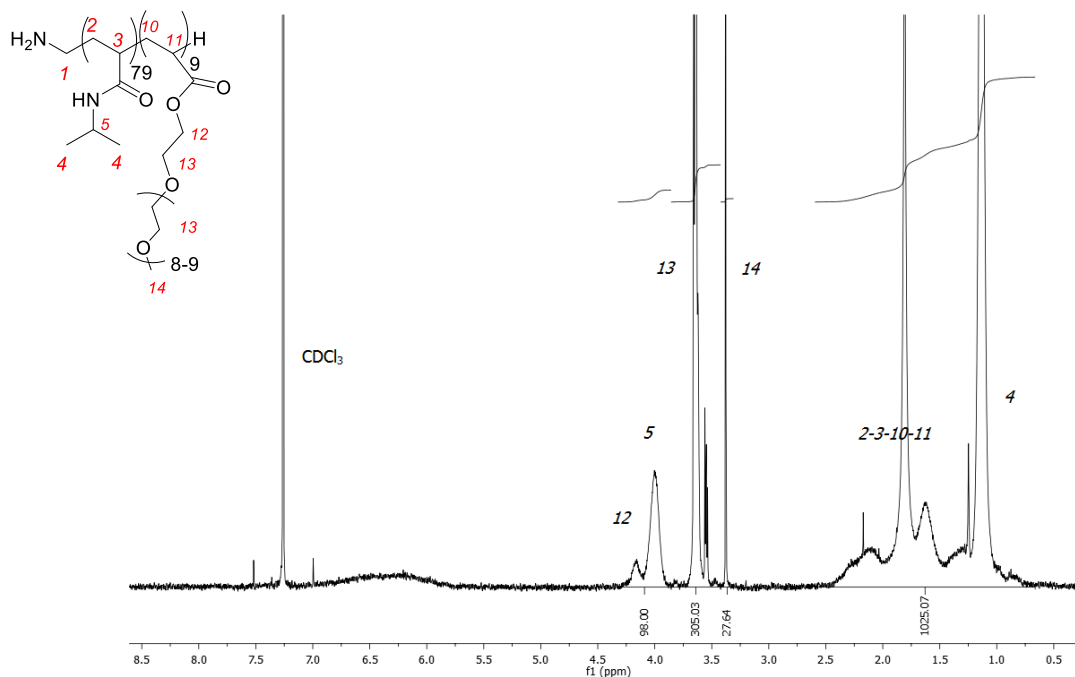

**Figure S5:** <sup>1</sup>H-NMR of D<sub>2</sub> after end cleavages (400 MHz, CDCl<sub>3</sub>, 303 K)  $\delta$  = 4.16 (s, -CH<sub>2</sub>OC(O)), 4.00 (s, -CH(NH)(CH<sub>3</sub>)<sub>2</sub>), 3.65 (m, -OCH<sub>2</sub>CH<sub>2</sub>O-), 3.38 (s, -OCH<sub>3</sub>), 2.2-1.2 (br, alkyl chain), 1.13 (s, (CH<sub>3</sub>)<sub>2</sub>CHN-) ppm.

## T<sub>1.1</sub> - poly[(BLG)<sub>60</sub>-*b*-(NIPAM)<sub>79</sub>-*b*-(PEGA)<sub>66</sub>]

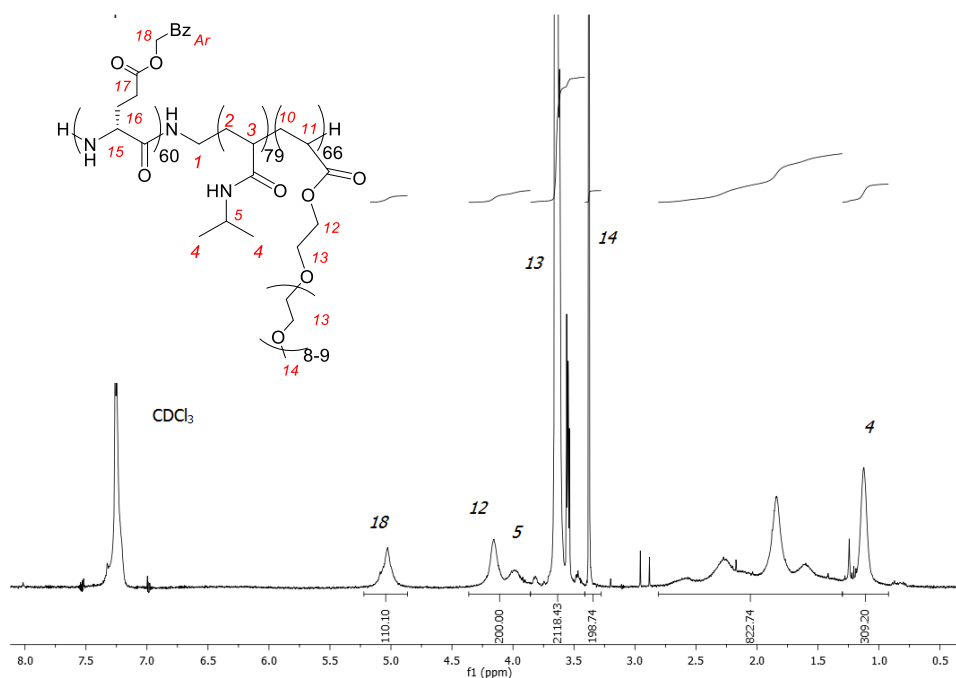

**Figure S6:** <sup>1</sup>H-NMR of T<sub>1.1</sub> (400 MHz, CDCl<sub>3</sub>, 303 K)  $\delta$  = 7.25 (m, Bz), 5.03 (br, -CH<sub>2</sub>Ph), 4.17 (s, -CH<sub>2</sub>OC(O) PEGA unit), 4.00 (s, -CH(NH)(CH<sub>3</sub>)<sub>2</sub>), 3.65 (m, -OCH<sub>2</sub>CH<sub>2</sub>O-), 3.38 (s, -OCH<sub>3</sub>), 2.2-1.2 (br, alkyl chain), 1.13 (s, (CH<sub>3</sub>)<sub>2</sub>CHN) ppm.

### T<sub>1.2</sub> - poly[(BLG)<sub>30</sub>-*b*-(NIPAM)<sub>79</sub>-*b*-(PEGA)<sub>66</sub>]

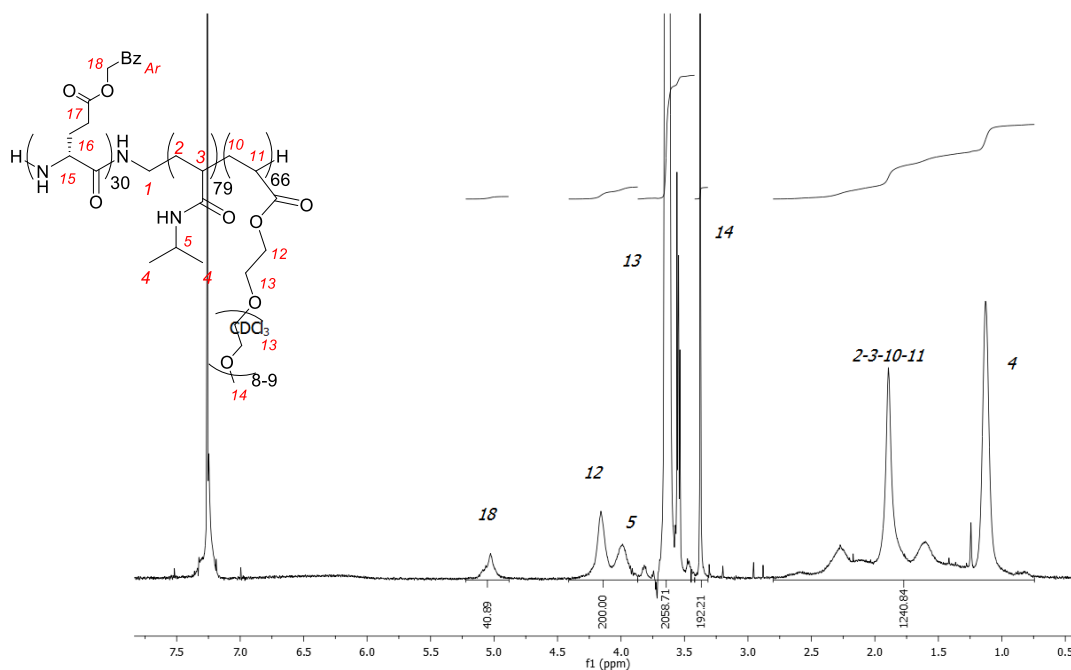

**Figure S7:** <sup>1</sup>H-NMR of T<sub>1.2</sub> (400 MHz, CDCl<sub>3</sub>, 303 K)  $\delta$  = 7.25 (m, Bz), 5.03 (br, -CH<sub>2</sub>Ph), 4.17 (s, -CH<sub>2</sub>OC(O) PEGA unit), 4.00 (s, -CH(NH)(CH<sub>3</sub>)<sub>2</sub>), 3.65 (m, -OCH<sub>2</sub>CH<sub>2</sub>O-), 3.38 (s, -OCH<sub>3</sub>), 2.2-1.2 (br, alkyl chain), 1.13 (s, (CH<sub>3</sub>)<sub>2</sub>CHN-) ppm.

### T<sub>1.3</sub> - poly[(BLG)<sub>7</sub>-*b*-(NIPAM)<sub>79</sub>-*b*-(PEGA)<sub>66</sub>]

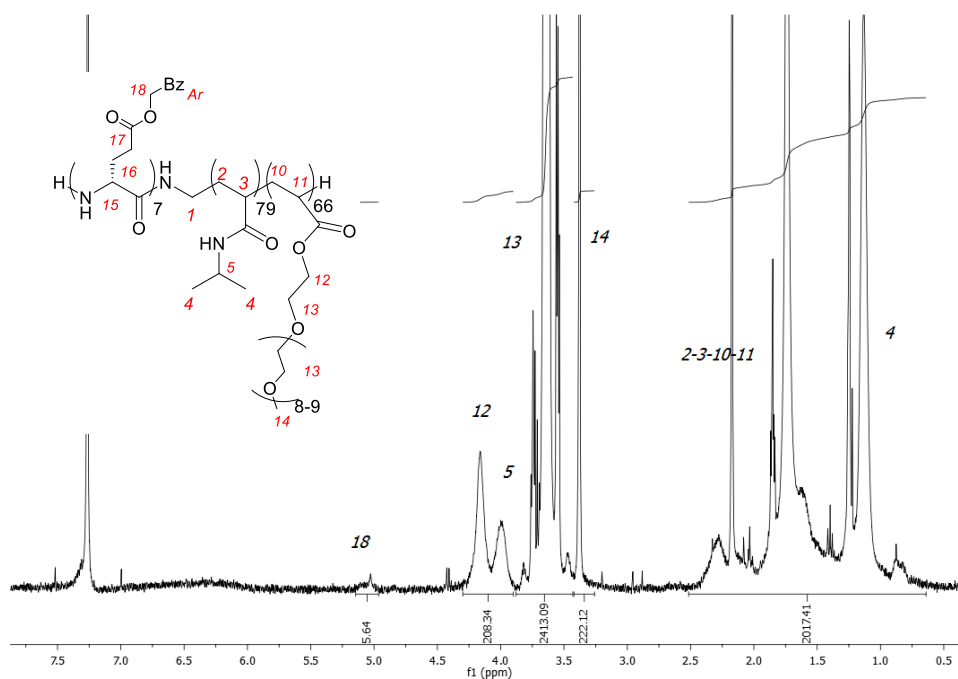

**Figure S8:** <sup>1</sup>H-NMR of T<sub>1.3</sub> (400 MHz, CDCl<sub>3</sub>, 303 K)  $\delta$  = 7.25 (m, Bz), 5.03 (br, -CH<sub>2</sub>Ph), 4.17 (s, -CH<sub>2</sub>OC(O) PEGA unit), 4.00 (s, -CH(NH)(CH<sub>3</sub>)<sub>2</sub>), 3.65 (m, -OCH<sub>2</sub>CH<sub>2</sub>O-), 3.38 (s, -OCH<sub>3</sub>), 2.2-1.2 (br, alkyl chain), 1.13 (s, (CH<sub>3</sub>)<sub>2</sub>CHN-) ppm.

### T<sub>2.1</sub> - poly[(BLG)<sub>60</sub>-*b*-(NIPAM)<sub>79</sub>-*b*-(PEGA)<sub>9</sub>]

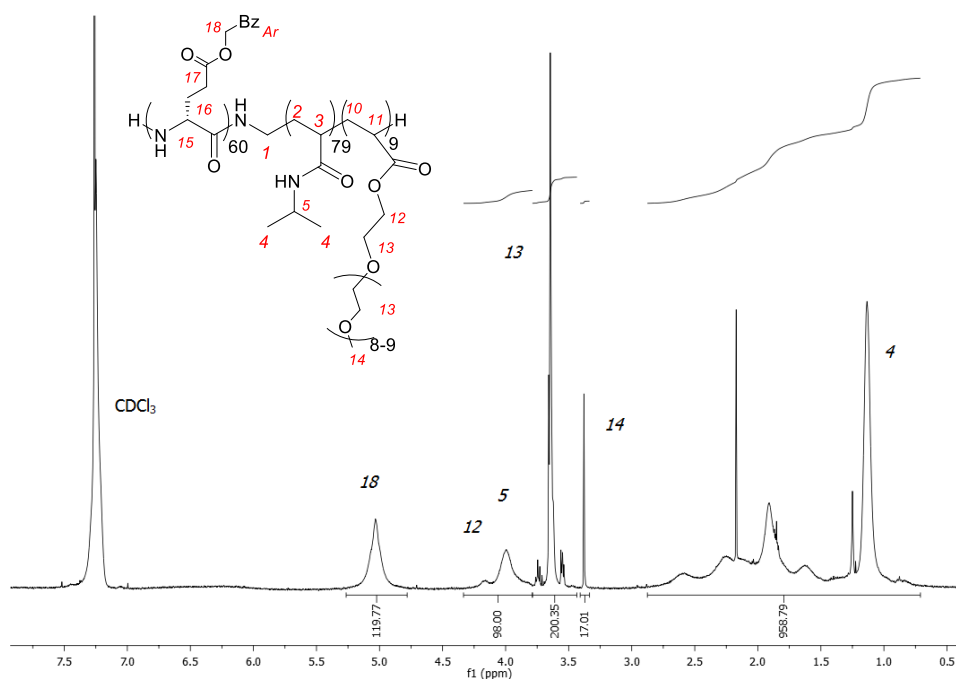

**Figure S9:** <sup>1</sup>H-NMR of T<sub>2.1</sub> (400 MHz, CDCl<sub>3</sub>, 303 K)  $\delta$  = 7.25 (m, Bz), 5.03 (br, -CH<sub>2</sub>Ph), 4.17 (s, -CH<sub>2</sub>OC(O) PEGA unit), 4.00 (s, -CH(NH)(CH<sub>3</sub>)<sub>2</sub>), 3.65 (m, -OCH<sub>2</sub>CH<sub>2</sub>O-), 3.38 (s, -OCH<sub>3</sub>), 2.2-1.2 (br, alkyl chain), 1.13 (s, (CH<sub>3</sub>)<sub>2</sub>CHN-) ppm.

### T<sub>2.2</sub> - poly[(BLG)<sub>30</sub>-*b*-(NIPAM)<sub>79</sub>-*b*-(PEGA)<sub>9</sub>]

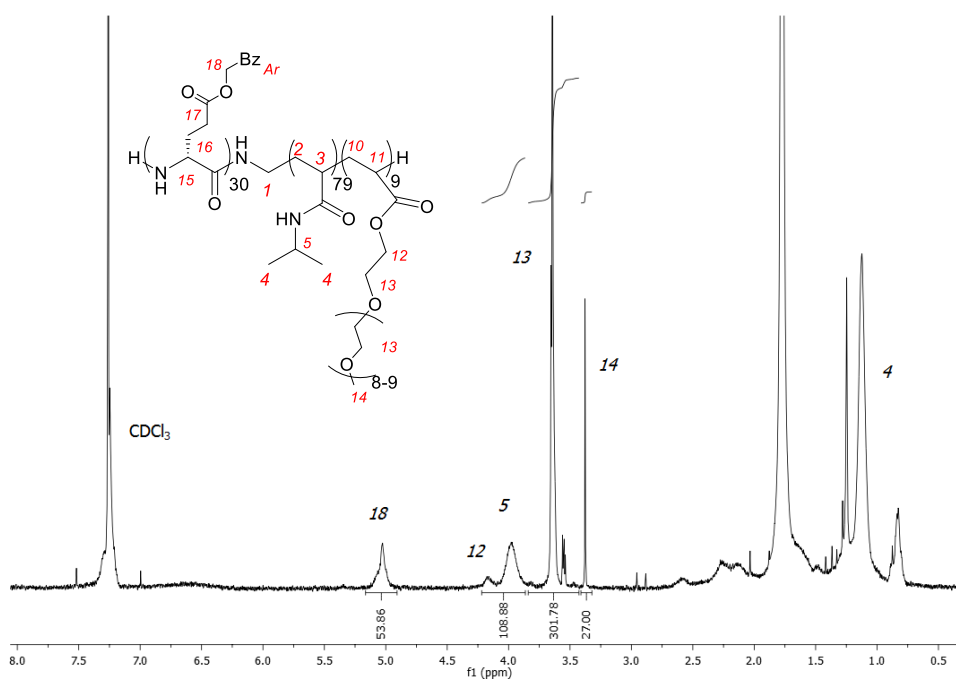

**Figure S10:** <sup>1</sup>H-NMR of T<sub>2.2</sub> (400 MHz, CDCl<sub>3</sub>, 303 K)  $\delta$  = 7.25 (m, Bz), 5.03 (br, -CH<sub>2</sub>Ph), 4.17 (s, -CH<sub>2</sub>OC(O) PEGA unit), 4.00 (s, -CH(NH)(CH<sub>3</sub>)<sub>2</sub>), 3.65 (m, -OCH<sub>2</sub>CH<sub>2</sub>O-), 3.38 (s, -OCH<sub>3</sub>), 2.2-1.2 (br, alkyl chain), 1.13 (s, (CH<sub>3</sub>)<sub>2</sub>CHN-) ppm.

### T<sub>2.3</sub> - poly[(BLG)<sub>7</sub>-*b*-(NIPAM)<sub>79</sub>-*b*-(PEGA)<sub>9</sub>]

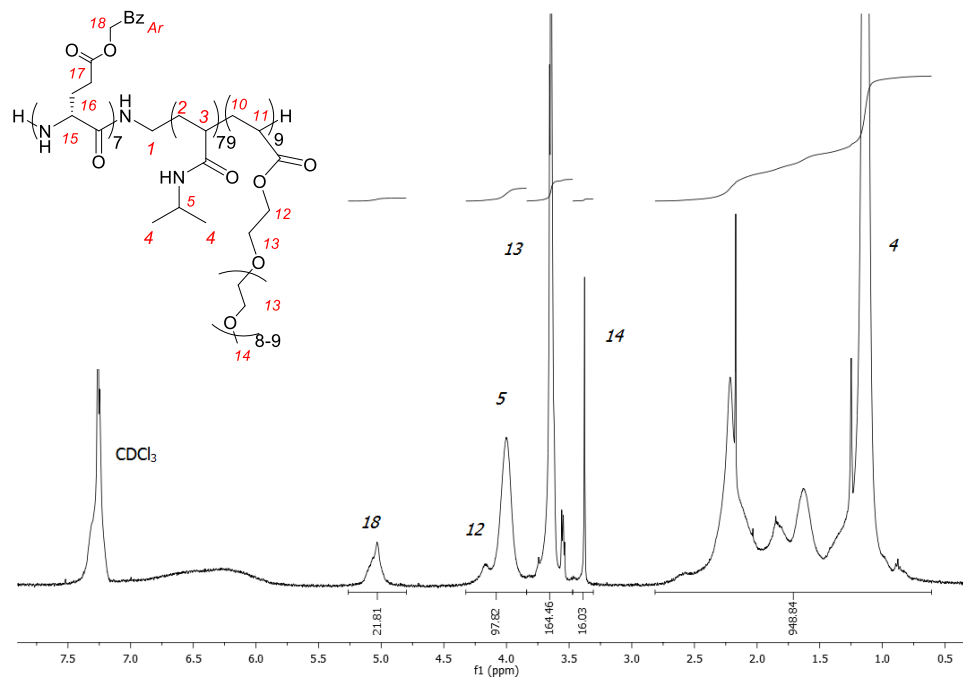

**Figure S 11:**  $^1\text{H-NMR}$  of  $T_{2.3}$  (400 MHz,  $\text{CDCl}_3$ , 303 K)  $\delta = 7.25$  (m, Bz), 5.03 (br,  $-\text{CH}_2\text{Ph}$ ), 4.17 (s,  $-\text{CH}_2\text{OC(O)}$  PEGA unit), 4.00 (s,  $-\text{CH}(\text{NH})(\text{CH}_3)_2$ ), 3.65 (m,  $-\text{OCH}_2\text{CH}_2\text{O}-$ ), 3.38 (s,  $-\text{OCH}_3$ ), 2.2-1.2 (br, alkyl chain), 1.13 (s,  $(\text{CH}_3)_2\text{CHN}-$ ) ppm.

## 2. GPC

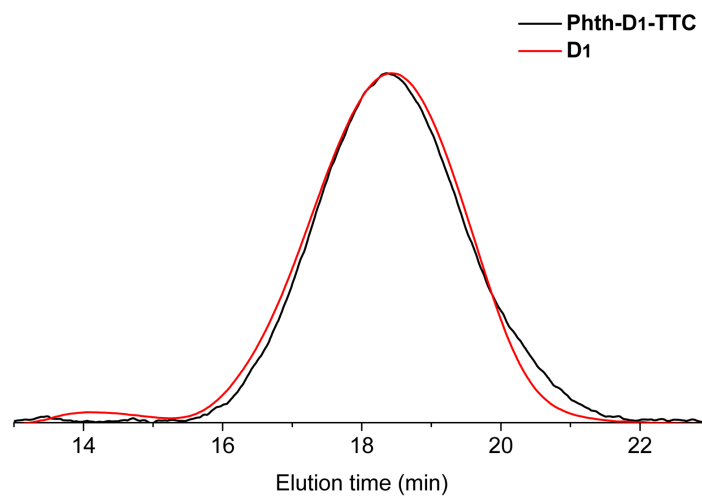

**Figure S 12:** SEC trace of Phth-poly[(NIPAM) $_{79}$ -*b*-(PEGA) $_{66}$ ]-TTC Phth-D $_1$ -TTC (black) and poly[(NIPAM) $_{79}$ -*b*-(PEGA) $_{66}$ ] (red). (DMF/LiBr, MALLS detection, 1 mL min $^{-1}$ , molecular mass determined against poly(styrene) standards).

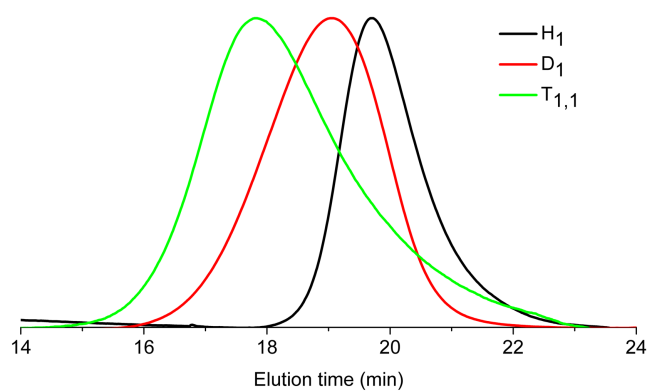

**Figure S13:** SEC traces (DMF/LiBr, dRI detection, molecular masses determined against poly(styrene) standards) of T<sub>1,1</sub>.  $\bar{M}_w = 17.3 \times 10^3 \text{ g mol}^{-1}$ ;  $\bar{M}_n = 15.1 \times 10^3 \text{ g mol}^{-1}$   $\bar{D} = 1.15$ .

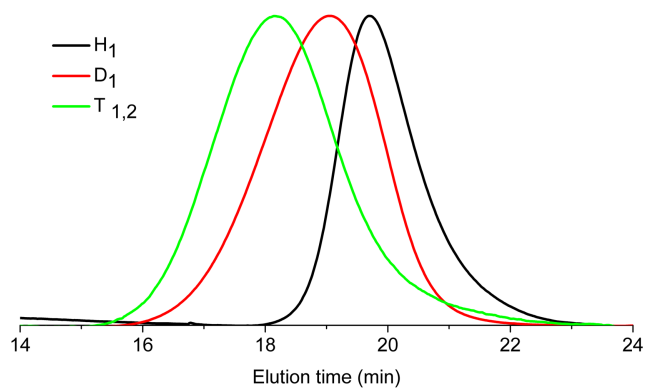

**Figure S14:** SEC traces (DMF/LiBr, dRI detection, molecular masses determined against poly(styrene) standards) of T<sub>1,2</sub>.  $\bar{M}_w = 13.7 \times 10^3 \text{ g mol}^{-1}$ ;  $\bar{M}_n = 11.3 \times 10^3 \text{ g mol}^{-1}$   $\bar{D} = 1.21$ .

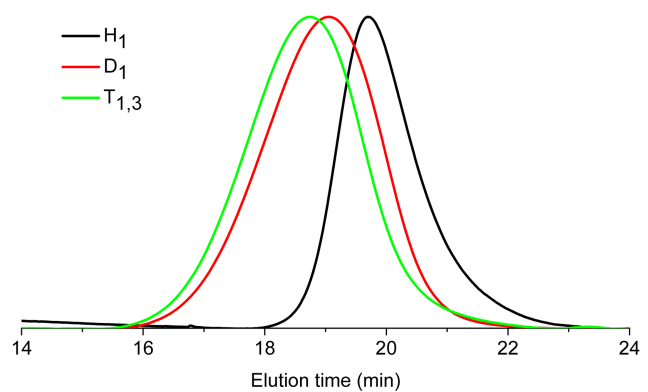

**Figure S15:** SEC traces (DMF/LiBr, dRI detection, molecular masses determined against poly(styrene) standards) of T<sub>1,3</sub>.  $\bar{M}_w = 13.9 \times 10^3 \text{ g mol}^{-1}$ ;  $\bar{M}_n = 11.1 \times 10^3 \text{ g mol}^{-1}$   $\bar{D} = 1.26$ .



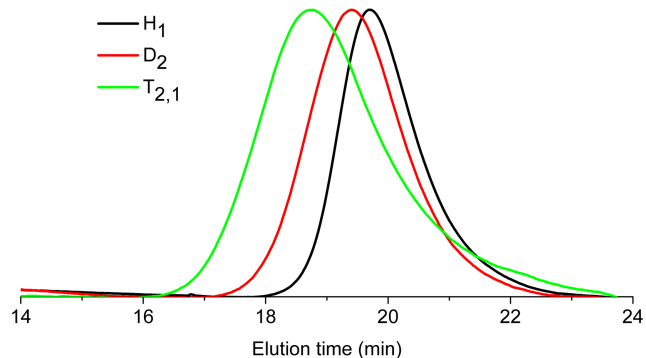

**Figure S16:** SEC traces (DMF/LiBr, dRI detection, molecular masses determined against poly(styrene) standards) of T<sub>2,1</sub>.  $\bar{M}_w = 13.3 \times 10^3 \text{ g mol}^{-1}$ ;  $\bar{M}_n = 12.3 \times 10^3 \text{ g mol}^{-1}$   $D = 1.08$ .

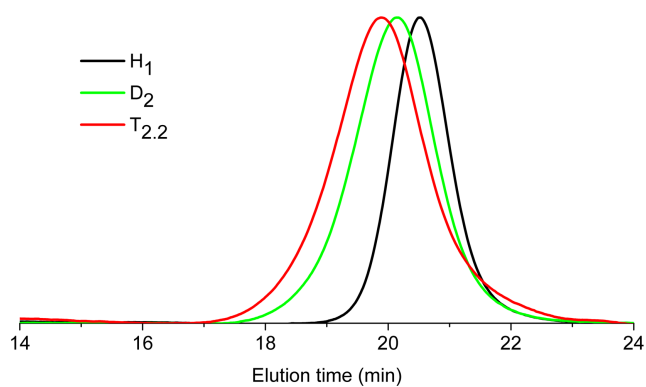

**Figure S17:** SEC traces (DMF/LiBr, dRI detection, molecular masses determined against poly(styrene) standards) of T<sub>2,2</sub>.  $\bar{M}_w = 8.60 \times 10^3 \text{ g mol}^{-1}$ ;  $\bar{M}_n = 7.84 \times 10^3 \text{ g mol}^{-1}$   $D = 1.10$ .

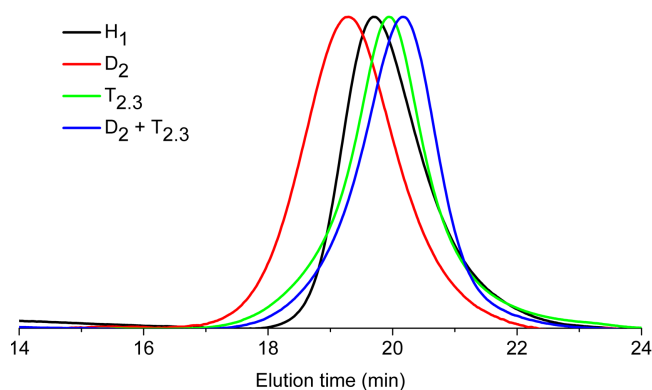

**Figure S18:** SEC traces (DMF/LiBr, dRI detection, molecular masses determined against poly(styrene) standards) of T<sub>2,3</sub>.  $\bar{M}_w = 6.32 \times 10^3 \text{ g mol}^{-1}$ ;  $\bar{M}_n = 5.76 \times 10^3 \text{ g mol}^{-1}$   $D = 1.10$ .

### 3. FTIR spectra

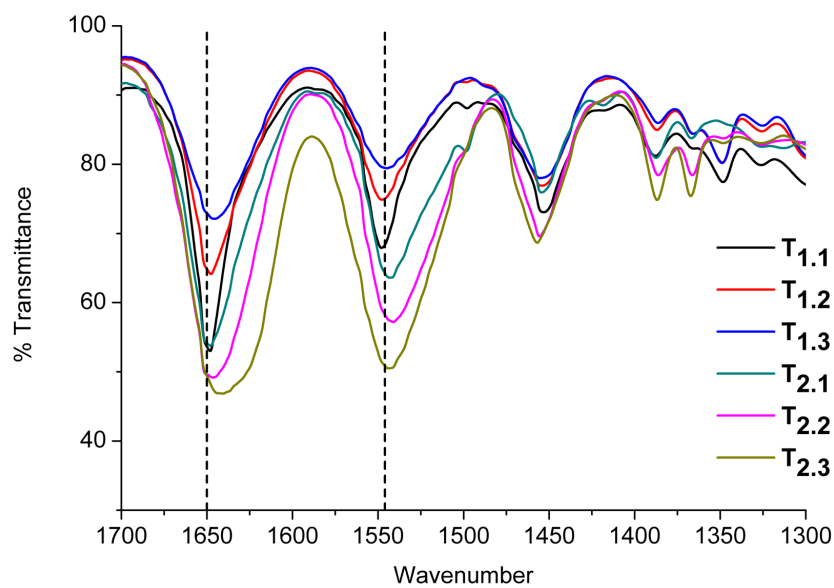

Figure S19: FTIR spectra of solid polymers, dashed lines representing the amide I and II peaks at 1546 and 1650  $\text{cm}^{-1}$ .

### 4. CD spectra

#### 4.1 CD spectra of particles from THF procedure

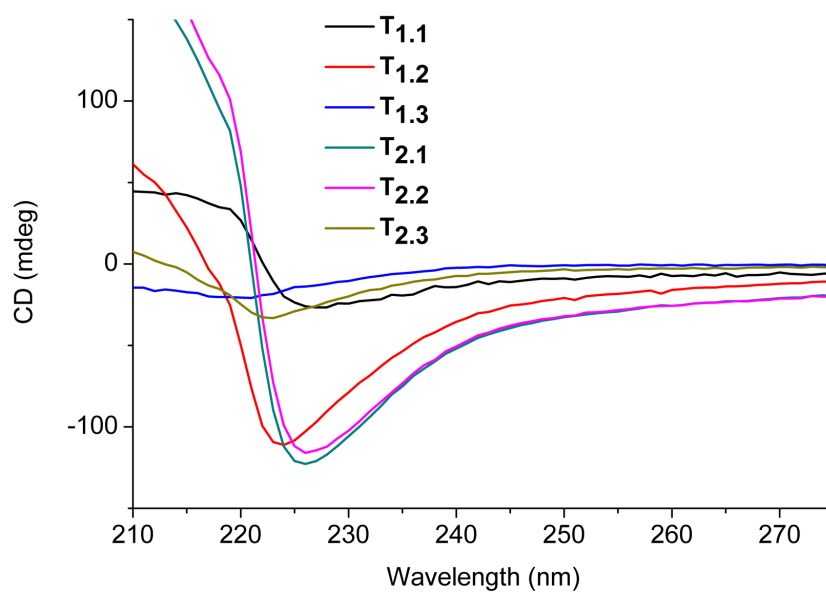

Figure S20: CD spectra of polymer solutions from solvent exchange procedure with THF.

## 4.2 CD spectra of particles from HFIP procedure

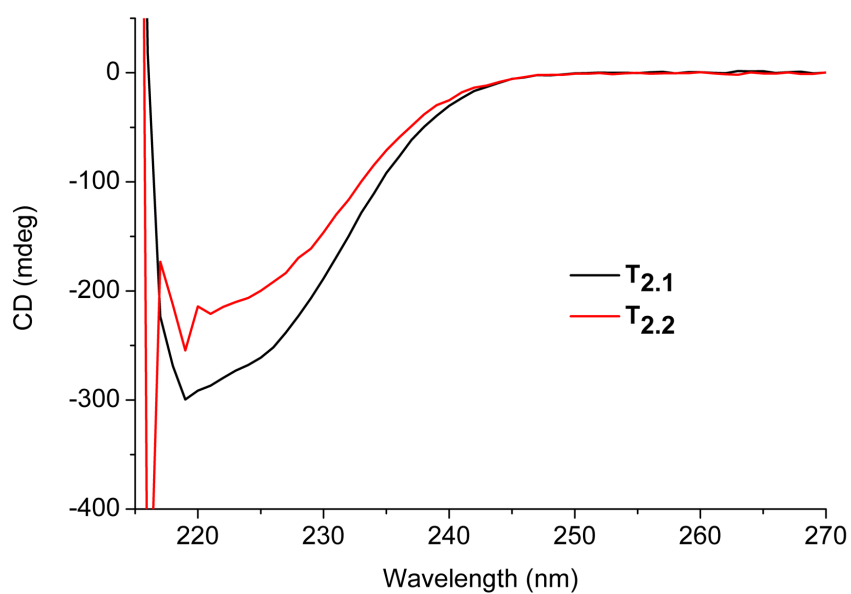

Figure S21: CD spectra of polymers dissolved in HFIP.

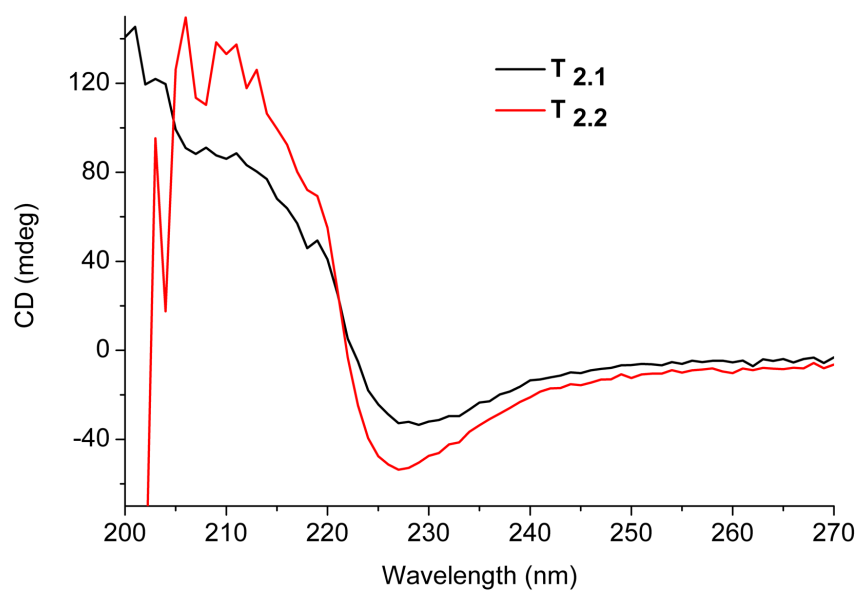

Figure S22: CD spectra of polymer solutions from solvent exchange procedure with HFIP.

## 5. AF4 experiments

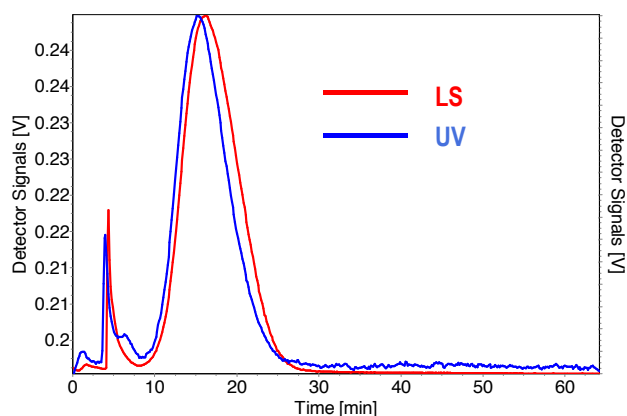

**Figure S23:** Raw Data Fractogram of AF4 – MALS & UV sample T2.1. The fractogram shows a system peak at ~7 min.

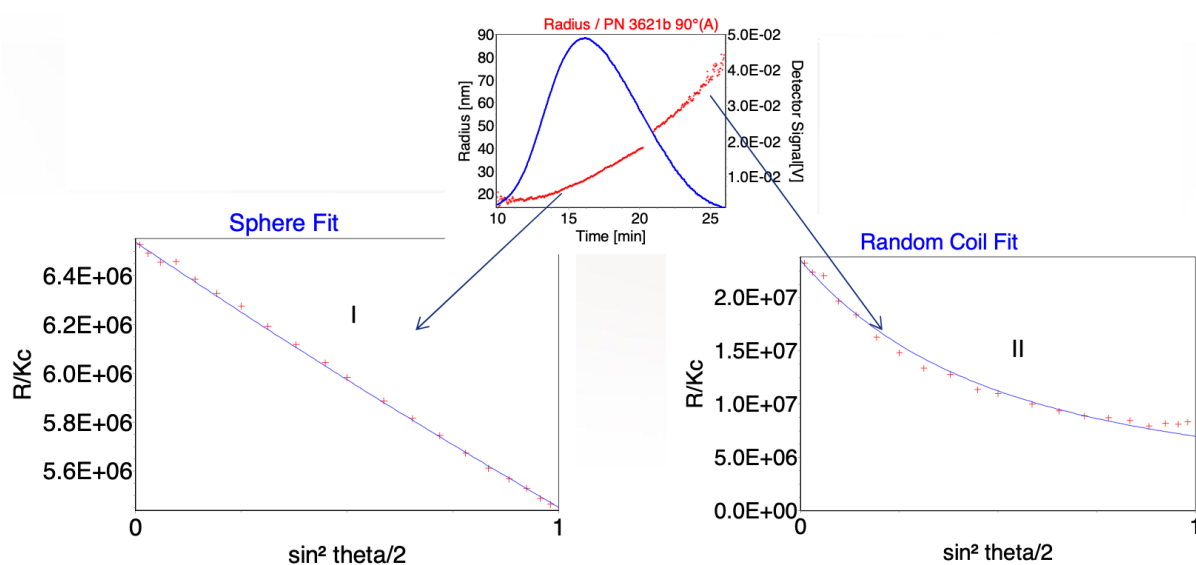

**Figure S24:** Data fitting of region I and II of T2.1 using a sphere fit and a random coil fit (see Figure 4, main manuscript).

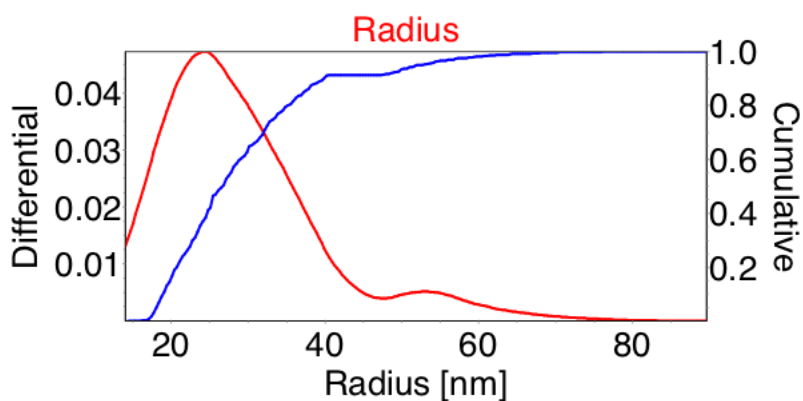

**Figure S25:** Differential Particle Size Distribution (red trace) and cumulative Particle Size Distribution (blue trace) of sample T2.1.

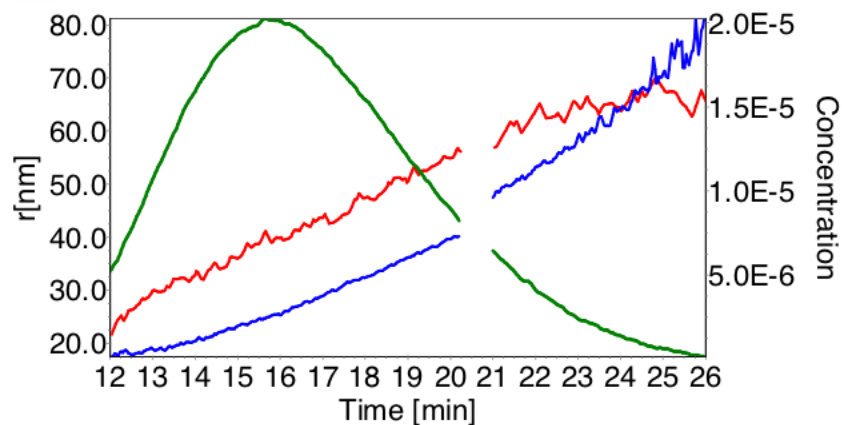

**Figure S26:** Overlay of the hydrodynamic radius ( $R_h$  from DLS; red), the radius of gyration ( $R_g$  from MALS; blue) and the concentration profile (green) of sample T2.1.

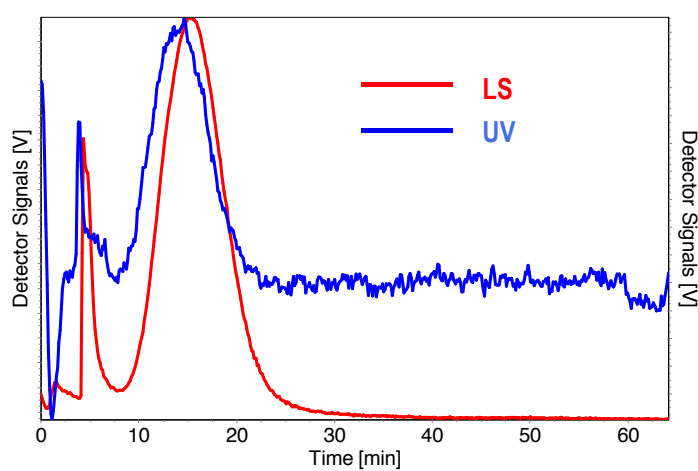

**Figure S27:** Raw Data Fractogram of AF4 – MALS & UV sample T2.2. The fractogram shows a system peak at  $\sim 7$  min.

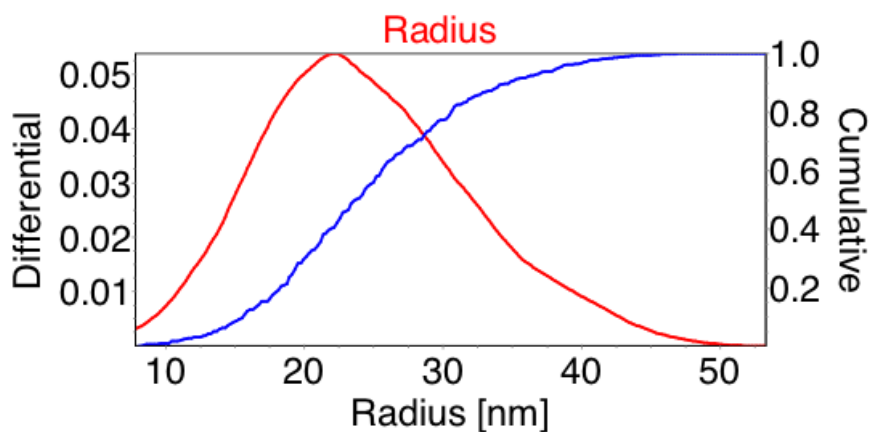

**Figure S28:** Differential Particle Size Distribution (red trace) and cumulative Particle Size Distribution (blue trace) of sample T2.2.

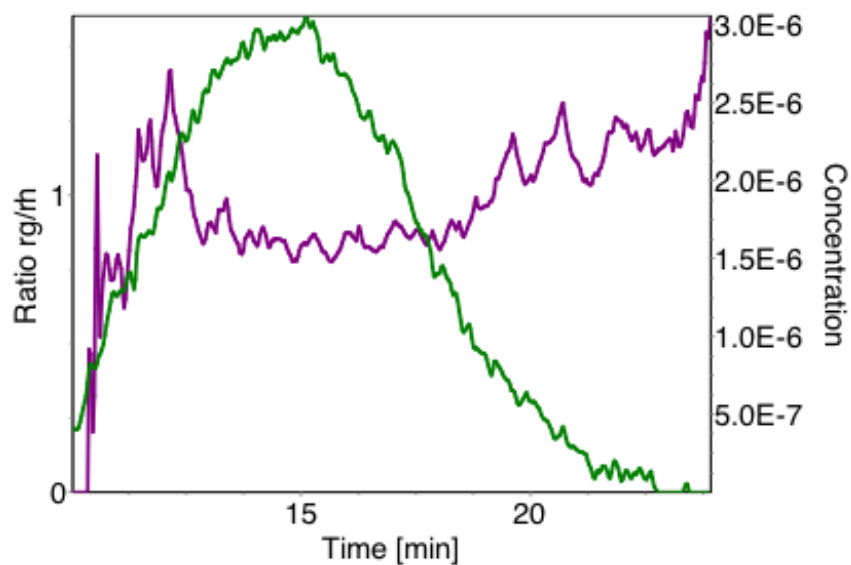

**Figure S29:** Overlay of the ratio of the  $R_g$  to  $R_h$  (purple) and the concentration profile (green) against elution time of sample T2.2.

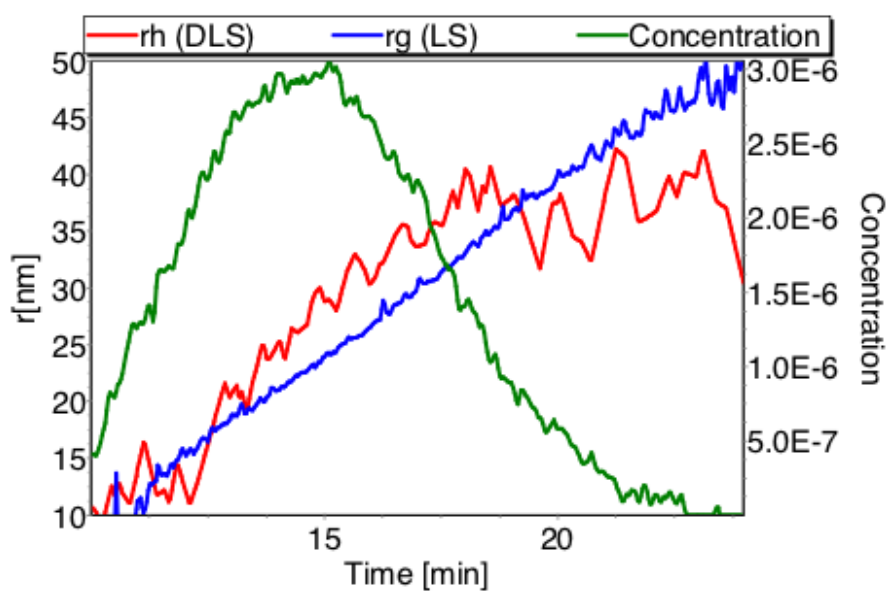

**Figure S30:** Overlay of the hydrodynamic radius ( $R_h$  from DLS; red), the radius of gyration ( $R_g$  from MALS; blue) and the concentration profile (green) of sample T2.2.

## 6. DLS experiments

### 6.1 DLS from THF solvent exchange procedure

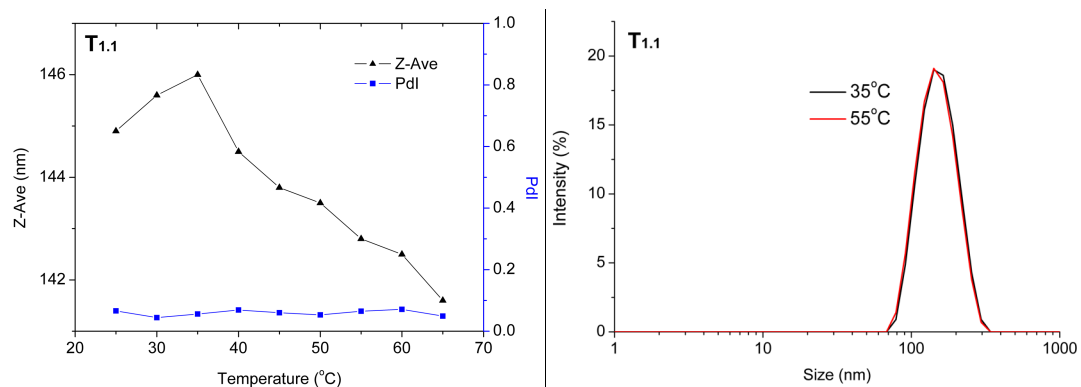

Figure S31: DLS traces of T<sub>1.1</sub> particles solutions obtained from THF.

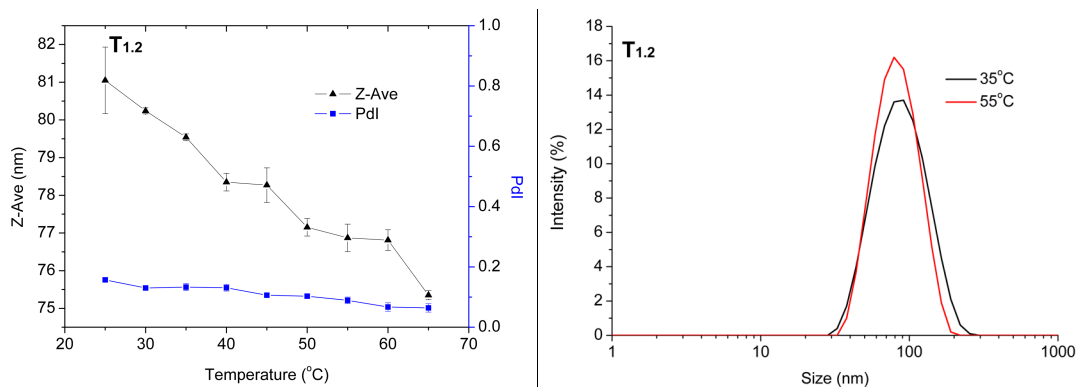

Figure S32: DLS traces of T<sub>1.2</sub> particles solutions obtained from THF.

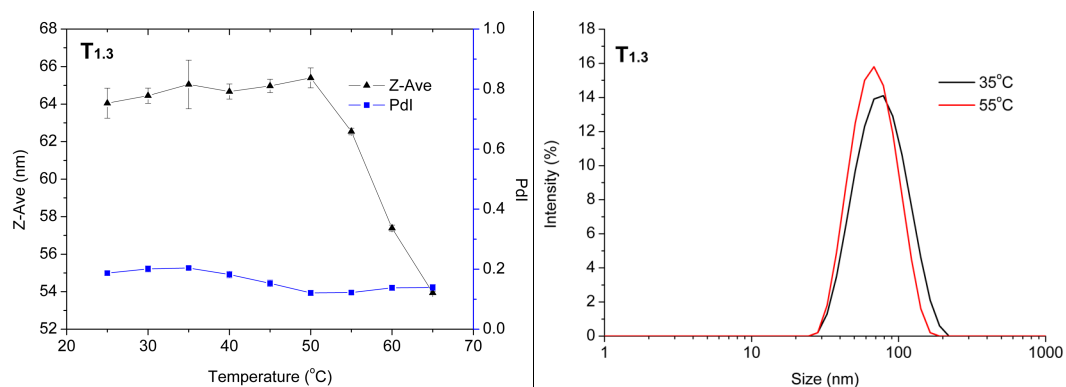

Figure S33: DLS traces of T<sub>1.3</sub> particles solutions obtained from THF.

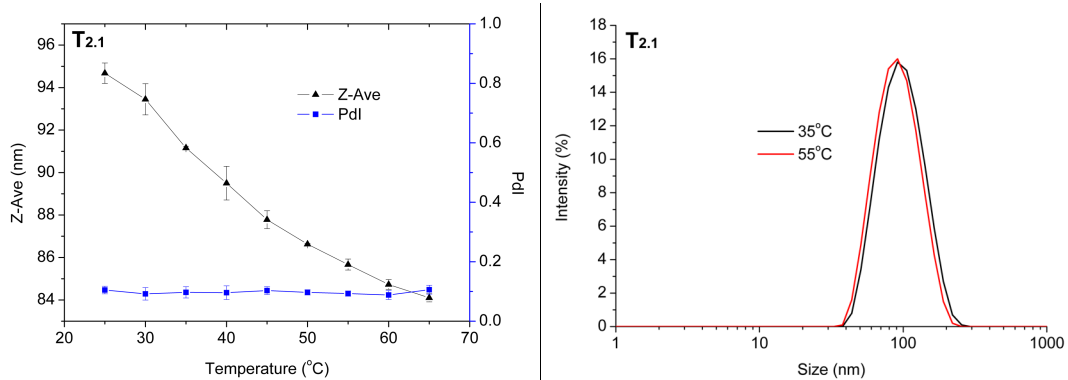

**Figure S34:** DLS traces of T<sub>2.1</sub> particles solutions obtained from THF.

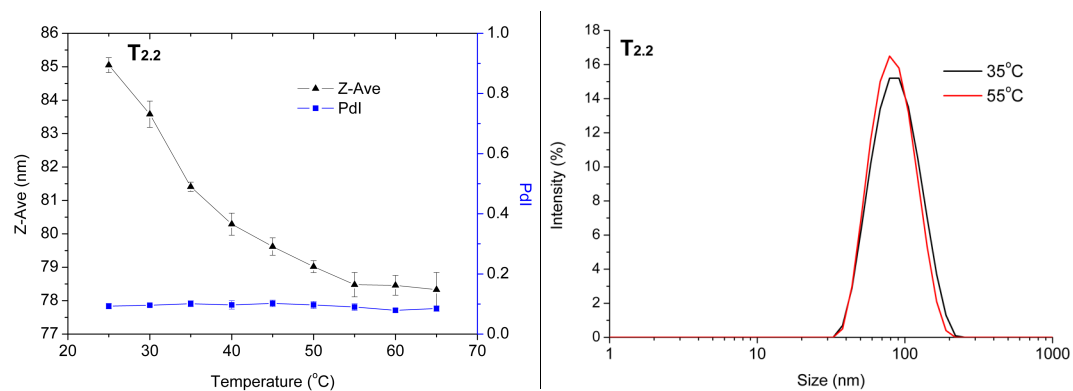

**Figure S35:** DLS traces of T<sub>2.2</sub> particles solutions obtained from THF.

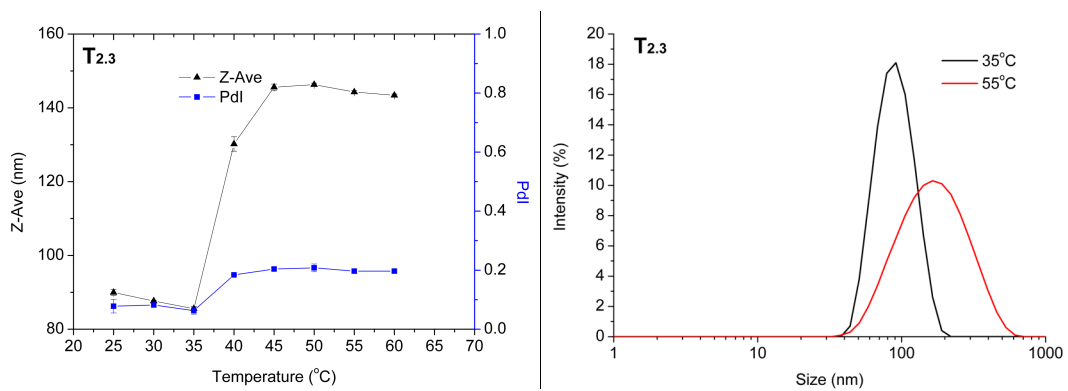

**Figure S36:** DLS traces of T<sub>2.3</sub> particles solutions obtained from THF.



## 6.2 DLS from HFIP solvent exchange procedure

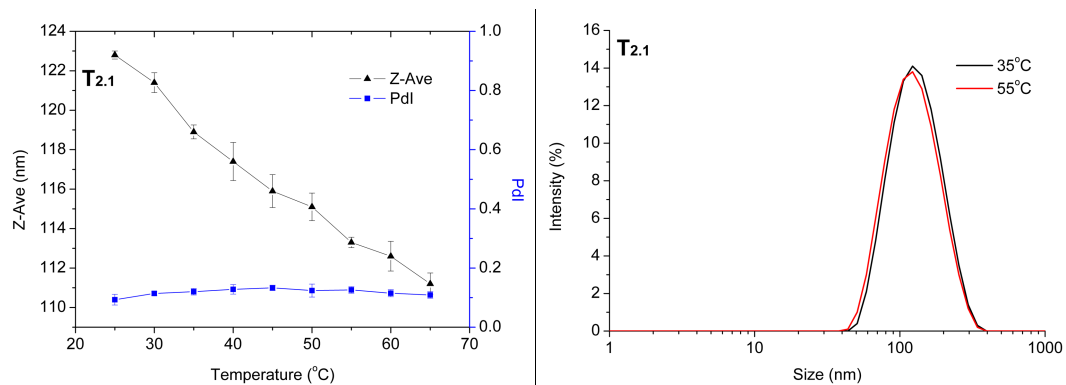

Figure S37: DLS traces of T<sub>2.1</sub> particles solutions obtained from HFIP.

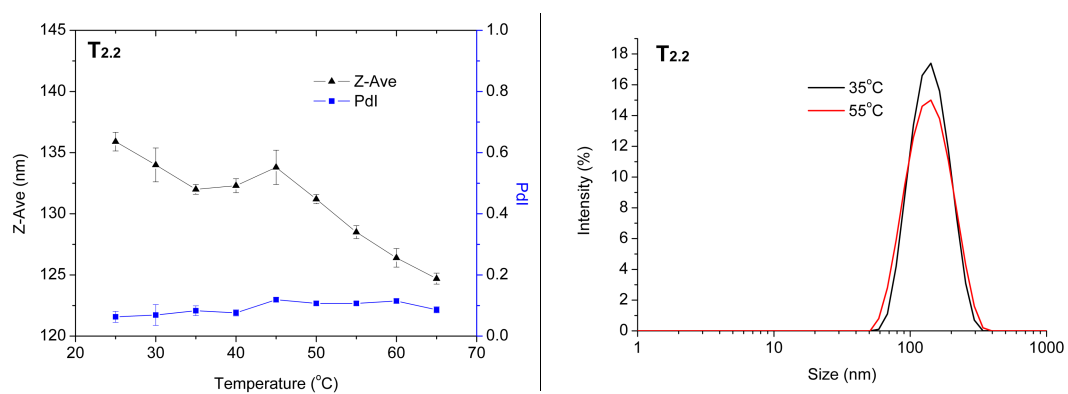

Figure S38: DLS traces of T<sub>2.2</sub> particles solutions obtained from HFIP.
